# Supplementary material for: Probing structure-functionality relationships of catalytic bimetallic Pt–Ru nanoparticles associated with improved sulfur resistance
Source: Royal Society of Chemistry journal article supplement (doi:10.1039/c4ra03474k), 2014-01-01
Supplement: c4ra03474k1.pdf [file c4ra03474k1.pdf]

## Supplementary Information of

# Probing Structure-Functionality Relationships of Catalytic Bimetallic Pt-Ru Nanoparticles Associated with Improved Sulfur Resistance

Jessica N. G. Stanley, Paul Benndorf, Falk Heinroth, Anthony F. Masters, and  
Thomas Maschmeyer\*

Laboratory of Advanced Catalysis for Sustainability

School of Chemistry, F11 The University of Sydney, Sydney, NSW 2006 Australia

\*thomas.maschmeyer@sydney.edu.au

## Models

Pt foil. Based on fcc structure.

$$\begin{aligned}N(1) &= 12 \\x(1) &= (1/2 \times 3.909) = 1.9545 \\y(1) &= (1/2 \times 3.909) = 1.9545 \\z(1) &= 0\end{aligned}$$

$$\begin{aligned}N(2) &= 6 \\x(2) &= 3.909 \\y(2) &= 0 \\z(2) &= 0\end{aligned}$$

$$\begin{aligned}N(3) &= 24 \\x(3) &= 3.909 \\y(3) &= (1/2 \times 3.909) = 1.9545 \\z(3) &= -(1/2 \times 3.909) = -1.9545\end{aligned}$$

$$\begin{aligned}N(4) &= 12 \\x(4) &= 3.909 \\y(4) &= 3.909 \\z(4) &= 0\end{aligned}$$

Ru foil. Based on hcp structure.

$$N(1) = 12$$

$$x(1) = (1/3 \times 2.31) = 0.77$$

$$y(1) = (2.67 / 2) = 1.335$$

$$z(1) = (4.27 / 2) = 2.135$$

$$N(2) = 6$$

$$x(2) = (2.31 + (1/3 \times 2.31)) = 3.08$$

$$y(2) = 0$$

$$z(2) = 2.135$$

$$N(3) = 2$$

$$x(3) = 0$$

$$y(3) = 0$$

$$z(3) = 4.27$$

$$N(4) = 18$$

$$x(4) = 4.67$$

$$y(4) = 0$$

$$z(4) = 0$$

$$N(5) = 12$$

$$x(5) = (2.67 / 2) = 2.31$$

$$y(5) = (2.67 / 2) = 1.335$$

$$z(5) = 4.27$$

$$N(6) = 16$$

$$x(6) = 4.67$$

$$y(6) = 2.67$$

$$z(6) = 0$$

## Best-Fit Parameters for Fresh, Poisoned and Regenerated Samples

### Pt<sub>1</sub>Ru<sub>3</sub>

| Pt L <sub>III</sub> -edge             |              |                         |                                  |                                          |              |                         |                                  |                                             |              |                         |                                  |
|---------------------------------------|--------------|-------------------------|----------------------------------|------------------------------------------|--------------|-------------------------|----------------------------------|---------------------------------------------|--------------|-------------------------|----------------------------------|
| Pt <sub>1</sub> Ru <sub>3</sub> fresh |              |                         |                                  | Pt <sub>1</sub> Ru <sub>3</sub> poisoned |              |                         |                                  | Pt <sub>1</sub> Ru <sub>3</sub> regenerated |              |                         |                                  |
|                                       | <i>R</i> (Å) | <i>N</i>                | σ <sup>2</sup> (Å <sup>2</sup> ) |                                          | <i>R</i> (Å) | <i>N</i>                | σ <sup>2</sup> (Å <sup>2</sup> ) |                                             | <i>R</i> (Å) | <i>N</i>                | σ <sup>2</sup> (Å <sup>2</sup> ) |
| Pt-Pt                                 | 2.75         | 3.1                     | 0.001                            | Pt-Pt                                    | 2.76         | 3.8                     | 0.001 <sub>f</sub>               | Pt-Pt                                       | 2.75         | 2.4                     | 0.001 <sub>f</sub>               |
| Pt-Pt                                 | 3.90         | 1.7                     | 0.003                            | Pt-Pt                                    | 3.91         | 2.8                     | 0.003 <sub>f</sub>               | Pt-Pt                                       | 3.91         | 1.5                     | 0.003 <sub>f</sub>               |
| Pt-Pt                                 | 4.78         | 3.0                     | 0.0009                           | Pt-Pt                                    | 4.79         | 3.8                     | 0.0009 <sub>f</sub>              | Pt-Pt                                       | 4.77         | 2.1                     | 0.0009 <sub>f</sub>              |
| Pt-Pt                                 | 5.53         | 0.4                     | 0.001                            | Pt-Pt                                    | 5.54         | 0.4                     | 0.001 <sub>f</sub>               | Pt-Pt                                       | 5.53         | 0.2                     | 0.001 <sub>f</sub>               |
| Pt-Ru                                 | 2.70         | 2.6                     | 0.002                            | Pt-Ru                                    | 2.70         | 2.2                     | 0.002 <sub>f</sub>               | Pt-Ru                                       | 2.71         | 2.8                     | 0.002 <sub>f</sub>               |
| Pt-Ru                                 | 3.79         | 0.7                     | 0.0009                           | Pt-Ru                                    | 3.79         | 0.3                     | 0.0009 <sub>f</sub>              | Pt-Ru                                       | 3.79         | 0.3                     | 0.0009 <sub>f</sub>              |
| Pt-Ru                                 | 4.70         | 4.7                     | 0.007                            | Pt-Ru                                    | 4.70         | 3.9                     | 0.007 <sub>f</sub>               | Pt-Ru                                       | 4.70         | 6.6                     | 0.007 <sub>f</sub>               |
| Pt-Ru                                 | 5.41         | 2.6                     | 0.005                            | Pt-Ru                                    | 5.40         | 2.2                     | 0.005 <sub>f</sub>               | Pt-Ru                                       | 5.40         | 2.8                     | 0.005 <sub>f</sub>               |
| <i>R</i> -factor = 9.67 %             |              | Chi <sup>2</sup> = 2.41 |                                  | <i>R</i> -factor = 9.56 %                |              | Chi <sup>2</sup> = 1.73 |                                  | <i>R</i> -factor = 13.2 %                   |              | Chi <sup>2</sup> = 5.09 |                                  |

### Pt<sub>1</sub>Ru<sub>3</sub>

| Ru K-edge                             |              |                         |                                  |                                          |              |                         |                                  |                                             |              |                         |                                  |
|---------------------------------------|--------------|-------------------------|----------------------------------|------------------------------------------|--------------|-------------------------|----------------------------------|---------------------------------------------|--------------|-------------------------|----------------------------------|
| Pt <sub>1</sub> Ru <sub>3</sub> fresh |              |                         |                                  | Pt <sub>1</sub> Ru <sub>3</sub> poisoned |              |                         |                                  | Pt <sub>1</sub> Ru <sub>3</sub> regenerated |              |                         |                                  |
|                                       | <i>R</i> (Å) | <i>N</i>                | σ <sup>2</sup> (Å <sup>2</sup> ) |                                          | <i>R</i> (Å) | <i>N</i>                | σ <sup>2</sup> (Å <sup>2</sup> ) |                                             | <i>R</i> (Å) | <i>N</i>                | σ <sup>2</sup> (Å <sup>2</sup> ) |
| Ru-Ru                                 | 2.67         | 8.5                     | 0.003                            | Ru-Ru                                    | 2.67         | 8.5                     | 0.003 <sub>f</sub>               | Ru-Ru                                       | 2.68         | 8.5                     | 0.003 <sub>f</sub>               |
| Ru-Ru                                 | 2.79         | 2.8                     | 0.0007                           | Ru-Ru                                    | 2.79         | 2.4                     | 0.0007 <sub>f</sub>              | Ru-Ru                                       | 3.79         | 2.8                     | 0.0007 <sub>f</sub>              |
| Ru-Ru                                 | 4.29         | 3.1                     | 0.001                            | Ru-Ru                                    | 4.29         | 2.6                     | 0.001 <sub>f</sub>               | Ru-Ru                                       | 4.30         | 2.3                     | 0.001 <sub>f</sub>               |
| Ru-Ru                                 | 4.67         | 6.2                     | 0.0009                           | Ru-Ru                                    | 4.67         | 5.6                     | 0.0009 <sub>f</sub>              | Ru-Ru                                       | 4.67         | 5.5                     | 0.0009 <sub>f</sub>              |
| Ru-Ru                                 | 5.08         | 12.2                    | 0.004                            | Ru-Ru                                    | 5.08         | 12.3                    | 0.004 <sub>f</sub>               | Ru-Ru                                       | 5.08         | 12.5                    | 0.004 <sub>f</sub>               |
| Ru-Ru                                 | 5.34         | 9.4                     | 0.002                            | Ru-Ru                                    | 5.34         | 8.0                     | 0.002 <sub>f</sub>               | Ru-Ru                                       | 5.33         | 7.9                     | 0.002 <sub>f</sub>               |
| Ru-Pt                                 | 2.70         | 0.2                     | 0.001                            | Ru-Pt                                    | 2.70         | 0.1                     | 0.001 <sub>f</sub>               | Ru-Pt                                       | 2.72         | 0.2                     | 0.001 <sub>f</sub>               |
| <i>R</i> -factor = 6.17 %             |              | Chi <sup>2</sup> = 1.74 |                                  | <i>R</i> -factor = 6.59 %                |              | Chi <sup>2</sup> = 2.09 |                                  | <i>R</i> -factor = 7.46 %                   |              | Chi <sup>2</sup> = 1.30 |                                  |

Pt<sub>1.5</sub>Ru<sub>1</sub>

| Pt L <sub>III</sub> -edge               |              |                         |                              |                                          |              |                         |                              |                                             |              |                         |                              |
|-----------------------------------------|--------------|-------------------------|------------------------------|------------------------------------------|--------------|-------------------------|------------------------------|---------------------------------------------|--------------|-------------------------|------------------------------|
| Pt <sub>1.5</sub> Ru <sub>1</sub> fresh |              |                         |                              | Pt <sub>1</sub> Ru <sub>3</sub> poisoned |              |                         |                              | Pt <sub>1</sub> Ru <sub>3</sub> regenerated |              |                         |                              |
|                                         | <i>R</i> (Å) | <i>N</i>                | $\sigma^2$ (Å <sup>2</sup> ) |                                          | <i>R</i> (Å) | <i>N</i>                | $\sigma^2$ (Å <sup>2</sup> ) |                                             | <i>R</i> (Å) | <i>N</i>                | $\sigma^2$ (Å <sup>2</sup> ) |
| Pt-Pt                                   | 2.76         | 9.9                     | 0.0008                       | Pt-Pt                                    | 2.76         | 10.1                    | 0.0008 <sub>f</sub>          | Pt-Pt                                       | 2.76         | 7.6                     | 0.0008 <sub>f</sub>          |
| Pt-Pt                                   | 3.91         | 4.9                     | 0.001                        | Pt-Pt                                    | 3.91         | 5.1                     | 0.001 <sub>f</sub>           | Pt-Pt                                       | 3.92         | 3.6                     | 0.001 <sub>f</sub>           |
| Pt-Pt                                   | 4.80         | 16.6                    | 0.001                        | Pt-Pt                                    | 4.80         | 17.6                    | 0.001 <sub>f</sub>           | Pt-Pt                                       | 4.80         | 12.3                    | 0.001 <sub>f</sub>           |
| Pt-Pt                                   | 5.53         | 9.9                     | 0.003                        | Pt-Pt                                    | 5.53         | 10.4                    | 0.003 <sub>f</sub>           | Pt-Pt                                       | 5.54         | 7.6                     | 0.003 <sub>f</sub>           |
| Pt-Ru                                   | 2.72         | 1.2                     | 0.009                        | Pt-Ru                                    | 2.72         | 1.0                     | 0.009 <sub>f</sub>           |                                             |              |                         |                              |
| <i>R</i> -factor = 4.96 %               |              | Chi <sup>2</sup> = 1.45 |                              | <i>R</i> -factor = 5.44 %                |              | Chi <sup>2</sup> = 1.30 |                              | <i>R</i> -factor = 7.59 %                   |              | Chi <sup>2</sup> = 4.41 |                              |

Pt<sub>1.5</sub>Ru<sub>1</sub>

| Ru K-edge                               |              |                         |                              |                                          |              |                         |                              |                                             |              |                         |                              |
|-----------------------------------------|--------------|-------------------------|------------------------------|------------------------------------------|--------------|-------------------------|------------------------------|---------------------------------------------|--------------|-------------------------|------------------------------|
| Pt <sub>1.5</sub> Ru <sub>1</sub> fresh |              |                         |                              | Pt <sub>1</sub> Ru <sub>3</sub> poisoned |              |                         |                              | Pt <sub>1</sub> Ru <sub>3</sub> regenerated |              |                         |                              |
|                                         | <i>R</i> (Å) | <i>N</i>                | $\sigma^2$ (Å <sup>2</sup> ) |                                          | <i>R</i> (Å) | <i>N</i>                | $\sigma^2$ (Å <sup>2</sup> ) |                                             | <i>R</i> (Å) | <i>N</i>                | $\sigma^2$ (Å <sup>2</sup> ) |
| Ru-Ru                                   | 2.68         | 7.8                     | 0.003                        | Ru-Ru                                    | 2.68         | 7.8                     | 0.003 <sub>f</sub>           | Ru-Ru                                       | 2.68         | 5.6                     | 0.003 <sub>f</sub>           |
| Ru-Ru                                   | 3.79         | 2.4                     | 0.0008                       | Ru-Ru                                    | 3.78         | 2.3                     | 0.0008 <sub>f</sub>          | Ru-Ru                                       | 3.79         | 2.3                     | 0.0008 <sub>f</sub>          |
| Ru-Ru                                   | 4.26         | 0.2                     | 0.001                        | Ru-Ru                                    | 4.24         | 0.4                     | 0.001 <sub>f</sub>           | Ru-Ru                                       | 4.27         | 0.7                     | 0.001 <sub>f</sub>           |
| Ru-Ru                                   | 4.68         | 7.0                     | 0.002                        | Ru-Ru                                    | 4.68         | 7.5                     | 0.002 <sub>f</sub>           | Ru-Ru                                       | 4.68         | 7.7                     | 0.002 <sub>f</sub>           |
| Ru-Ru                                   | 5.05         | 4.1                     | 0.0008                       | Ru-Ru                                    | 5.05         | 3.8                     | 0.0008 <sub>f</sub>          | Ru-Ru                                       | 5.05         | 4.8                     | 0.0008 <sub>f</sub>          |
| Ru-Ru                                   | 5.34         | 4.2                     | 0.0006                       | Ru-Ru                                    | 5.34         | 4.9                     | 0.0006 <sub>f</sub>          | Ru-Ru                                       | 5.34         | 4.7                     | 0.0006 <sub>f</sub>          |
| Ru-Pt                                   | 2.72         | 2.3                     | 0.005                        | Ru-Pt                                    | 2.72         | 1.8                     | 0.005 <sub>f</sub>           | Ru-Pt                                       | 2.73         | 3.1                     | 0.005 <sub>f</sub>           |
| <i>R</i> -factor = 5.84 %               |              | Chi <sup>2</sup> = 0.64 |                              | <i>R</i> -factor = 7.72 %                |              | Chi <sup>2</sup> = 0.88 |                              | <i>R</i> -factor = 7.15 %                   |              | Chi <sup>2</sup> = 1.12 |                              |

## Lists of Restraints

### Pt L<sub>III</sub> Edge

Pt foil

$s_1 > 0.001 \{0.001\}$   
 $s_2 > 0.001 \{0.001\}$   
 $s_3 > 0.001 \{0.001\}$   
 $s_4 > 0.001 \{0.001\}$   
 $s_1 < 0.01 \{0.001\}$   
 $s_2 < 0.01 \{0.001\}$   
 $s_3 < 0.01 \{0.001\}$   
 $s_4 < 0.01 \{0.001\}$   
 $S_{O2} \sim 0.85 \{0.2\}$   
 $E_0 < -1 \{0.5\}$   
 $|(v_1 - v_0)| \sim 2.76 \{0.01\}$   
 $|(v_2 - v_0)| \sim 3.91 \{0.01\}$   
 $|(v_3 - v_0)| \sim 4.79 \{0.01\}$   
 $|(v_4 - v_0)| \sim 5.53 \{0.01\}$   
 $s_1 \sim s_2 \{0.015\}$   
 $s_2 \sim s_3 \{0.015\}$   
 $s_3 \sim s_4 \{0.015\}$   
 $|(v_2 - v_1)| \sim 2.765 \{0.05\}$   
 $|(v_3 - v_2)| \sim 2.765 \{0.05\}$   
 $|(v_4 - v_3)| \sim 2.765 \{0.05\}$   
 $|(v_3 - v_1)| \sim 2.765 \{0.05\}$   
 $|(v_1 - v_4)| \sim 2.765 \{0.05\}$

Pt catalyst

$s_1 > 0.001 \{0.001\}$   
 $s_2 > 0.001 \{0.001\}$   
 $s_3 > 0.001 \{0.001\}$   
 $s_4 > 0.001 \{0.001\}$   
 $s_1 < 0.01 \{0.001\}$   
 $s_2 < 0.01 \{0.001\}$   
 $s_3 < 0.01 \{0.001\}$   
 $s_4 < 0.01 \{0.001\}$   
 $S_{O2} \sim 0.85 \{0.2\}$

$E_0 < -1 \{0.5\}$   
 $s_1 \approx s_2 \{0.015\}$   
 $s_2 \approx s_3 \{0.015\}$   
 $s_3 \approx s_4 \{0.015\}$   
 $|(v_2 - v_1)| \approx 2.765 \{0.05\}$   
 $|(v_3 - v_2)| \approx 2.765 \{0.05\}$   
 $|(v_4 - v_3)| \approx 2.765 \{0.05\}$   
 $|(v_3 - v_1)| \approx 2.765 \{0.05\}$   
 $|(v_1 - v_0)| \approx 2.76 \{0.05\}$   
 $|(v_2 - v_0)| \approx 3.91 \{0.05\}$   
 $|(v_3 - v_0)| \approx 4.79 \{0.05\}$   
 $|(v_4 - v_0)| \approx 5.53 \{0.05\}$

Pt<sub>1</sub>Ru<sub>3</sub> catalyst (fresh, poisoned, regenerated)

$s_1 > 0.001 \{0.001\}$   
 $s_2 > 0.001 \{0.001\}$   
 $s_3 > 0.001 \{0.001\}$   
 $s_4 > 0.001 \{0.001\}$   
 $s_1 < 0.01 \{0.001\}$   
 $s_2 < 0.01 \{0.001\}$   
 $s_3 < 0.01 \{0.001\}$   
 $s_4 < 0.01 \{0.001\}$   
 $S_{O_2} \approx 0.85 \{0.2\}$   
 $E_0 < -1 \{0.5\}$   
 $|(v_1 - v_0)| \approx 2.76 \{0.01\}$   
 $|(v_2 - v_0)| \approx 3.91 \{0.01\}$   
 $|(v_3 - v_0)| \approx 4.79 \{0.01\}$   
 $|(v_4 - v_0)| \approx 5.53 \{0.01\}$   
 $s_1 \approx s_2 \{0.015\}$   
 $s_2 \approx s_3 \{0.015\}$   
 $s_3 \approx s_4 \{0.015\}$   
 $|(v_2 - v_1)| \approx 2.765 \{0.05\}$   
 $|(v_3 - v_2)| \approx 2.765 \{0.05\}$   
 $|(v_4 - v_3)| \approx 2.765 \{0.05\}$   
 $|(v_3 - v_1)| \approx 2.765 \{0.05\}$   
 $|(v_1 - v_4)| \approx 2.765 \{0.05\}$   
 $s_5 \approx s_1 \{0.015\}$   
 $s_5 > 0.001 \{0.001\}$   
 $s_5 < 0.01 \{0.001\}$   
 $|(v_6 - v_0)| \approx 3.79 \{0.01\}$   
 $|(v_6 - v_5)| \approx 2.7 \{0.05\}$   
 $|(v_5 - v_0)| \approx 2.7 \{0.01\}$   
 $s_6 > 0.001 \{0.001\}$   
 $s_6 < 0.01 \{0.001\}$

$|(v7 - v0)| \approx 4.7 \{0.01\}$   
 $|(v7 - v6)| \approx 2.7 \{0.05\}$   
 $|(v7 - v5)| \approx 2.7 \{0.05\}$   
 $s7 > 0.001 \{0.001\}$   
 $s7 < 0.01 \{0.001\}$   
 $|(v8 - v0)| \approx 5.4 \{0.01\}$   
 $s8 > 0.001 \{0.001\}$   
 $s8 < 0.01 \{0.001\}$   
 $s5 \approx s6 \{0.015\}$   
 $s6 \approx s7 \{0.015\}$   
 $s7 \approx s8 \{0.015\}$   
 $|(v8 - v7)| \approx 2.7 \{0.05\}$   
 $|(v8 - v5)| \approx 2.7 \{0.05\}$

Pt<sub>1.5</sub>Ru<sub>1</sub> catalyst (fresh, poisoned, regenerated)

$s1 > 0.001 \{0.001\}$   
 $s2 > 0.001 \{0.001\}$   
 $s3 > 0.001 \{0.001\}$   
 $s4 > 0.001 \{0.001\}$   
 $s1 < 0.01 \{0.001\}$   
 $s2 < 0.01 \{0.001\}$   
 $s3 < 0.01 \{0.001\}$   
 $s4 < 0.01 \{0.001\}$   
 $S02 \approx 0.85 \{0.2\}$   
 $E0 < -1 \{0.5\}$   
 $|(v1 - v0)| \approx 2.76 \{0.01\}$   
 $|(v2 - v0)| \approx 3.91 \{0.01\}$   
 $|(v3 - v0)| \approx 4.79 \{0.01\}$   
 $|(v4 - v0)| \approx 5.53 \{0.01\}$   
 $s1 \approx s2 \{0.015\}$   
 $s2 \approx s3 \{0.015\}$   
 $s3 \approx s4 \{0.015\}$   
 $|(v2 - v1)| \approx 2.765 \{0.05\}$   
 $|(v3 - v2)| \approx 2.765 \{0.05\}$   
 $|(v4 - v3)| \approx 2.765 \{0.05\}$   
 $|(v3 - v1)| \approx 2.765 \{0.05\}$   
 $|(v1 - v4)| \approx 2.765 \{0.05\}$   
 $s5 \approx s1 \{0.015\}$   
 $s5 > 0.001 \{0.001\}$   
 $s5 < 0.01 \{0.001\}$   
 $|(v5 - v0)| \approx 2.72 \{0.01\}$

## Pt<sub>1</sub>Ru<sub>1.5</sub> catalyst

s1 > 0.001 {0.001}  
s2 > 0.001 {0.001}  
s3 > 0.001 {0.001}  
s4 > 0.001 {0.001}  
s1 < 0.01 {0.001}  
s2 < 0.01 {0.001}  
s3 < 0.01 {0.001}  
s4 < 0.01 {0.001}  
S02 ≈ 0.85 {0.2}  
E0 < -1 {0.5}  
|(v1 - v0)| ≈ 2.76 {0.01}  
|(v2 - v0)| ≈ 3.91 {0.01}  
|(v3 - v0)| ≈ 4.79 {0.01}  
|(v4 - v0)| ≈ 5.53 {0.01}  
s1 ≈ s2 {0.015}  
s2 ≈ s3 {0.015}  
s3 ≈ s4 {0.015}  
|(v2 - v1)| ≈ 2.765 {0.05}  
|(v3 - v2)| ≈ 2.765 {0.05}  
|(v4 - v3)| ≈ 2.765 {0.05}  
|(v3 - v1)| ≈ 2.765 {0.05}  
|(v1 - v4)| ≈ 2.765 {0.05}  
s1 ≈ s5 {0.015}  
|(v5 - v0)| ≈ 2.7 {0.01}  
s5 > 0.001 {0.001}  
s5 < 0.01 {0.001}

## Ru K Edge

### Ru foil

s1 > 0.001 {0.001}  
s2 > 0.001 {0.001}  
s3 > 0.001 {0.001}  
s4 > 0.001 {0.001}  
s1 < 0.01 {0.001}  
s2 < 0.01 {0.001}  
s3 < 0.01 {0.001}  
s4 < 0.01 {0.001}  
S02 ≈ 0.85 {0.2}  
E0 < -1 {0.5}  
s1 ≈ s2 {0.015}  
s2 ≈ s3 {0.015}  
s3 ≈ s4 {0.015}  
|(v1 - v0)| ≈ 2.67 {0.05}  
|(v2 - v0)| ≈ 3.78 {0.05}



$|(v2 - v1)| \approx 2.67 \{0.05\}$   
 $|(v3 - v0)| \approx 4.27 \{0.05\}$   
 $|(v3 - v1)| \approx 2.67 \{0.05\}$   
 $|(v4 - v0)| \approx 4.67 \{0.05\}$   
 $|(v4 - v2)| \approx 2.67 \{0.05\}$   
 $|(v5 - v0)| \approx 5.06 \{0.05\}$   
 $|(v5 - v3)| \approx 2.67 \{0.05\}$   
 $|(v5 - v2)| \approx 2.67 \{0.05\}$   
 $|(v5 - v1)| \approx 2.67 \{0.05\}$   
 $s5 > 0.001 \{0.001\}$   
 $s5 < 0.01 \{0.001\}$   
 $s4 \approx s5 \{0.015\}$   
 $|(v6 - v0)| \approx 5.33 \{0.05\}$   
 $|(v6 - v4)| \approx 2.67 \{0.05\}$   
 $s6 > 0.001 \{0.001\}$   
 $s6 < 0.01 \{0.001\}$   
 $s6 \approx s5 \{0.015\}$

#### Ru catalyst

$s1 > 0.001 \{0.001\}$   
 $s2 > 0.001 \{0.001\}$   
 $s3 > 0.001 \{0.001\}$   
 $s4 > 0.001 \{0.001\}$   
 $s1 < 0.01 \{0.001\}$   
 $s2 < 0.01 \{0.001\}$   
 $s3 < 0.01 \{0.001\}$   
 $s4 < 0.01 \{0.001\}$   
 $S02 \approx 0.85 \{0.2\}$   
 $E0 < -1 \{0.5\}$   
 $s1 \approx s2 \{0.015\}$   
 $s2 \approx s3 \{0.015\}$   
 $s3 \approx s4 \{0.015\}$   
 $|(v1 - v0)| \approx 2.67 \{0.05\}$   
 $|(v2 - v0)| \approx 3.78 \{0.05\}$   
 $|(v2 - v1)| \approx 2.67 \{0.05\}$   
 $|(v3 - v0)| \approx 4.27 \{0.05\}$   
 $|(v3 - v1)| \approx 2.67 \{0.05\}$   
 $|(v4 - v0)| \approx 4.67 \{0.05\}$   
 $|(v4 - v2)| \approx 2.67 \{0.05\}$   
 $|(v5 - v0)| \approx 5.06 \{0.05\}$   
 $|(v5 - v3)| \approx 2.67 \{0.05\}$   
 $|(v5 - v2)| \approx 2.67 \{0.05\}$   
 $|(v5 - v1)| \approx 2.67 \{0.05\}$   
 $s5 > 0.001 \{0.001\}$   
 $s5 < 0.01 \{0.001\}$   
 $s4 \approx s5 \{0.015\}$

$|(v6 - v0)| \approx 5.33 \{0.05\}$   
 $|(v6 - v4)| \approx 2.67 \{0.05\}$   
 $s6 > 0.001 \{0.001\}$   
 $s6 < 0.01 \{0.001\}$   
 $s6 \approx s5 \{0.015\}$   
 $N5 < 12 \{2\}$

Pt<sub>1</sub>Ru<sub>3</sub> catalyst (fresh, poisoned, regenerated)

$s1 > 0.001 \{0.001\}$   
 $s2 > 0.001 \{0.001\}$   
 $s3 > 0.001 \{0.001\}$   
 $s4 > 0.001 \{0.001\}$   
 $s1 < 0.01 \{0.001\}$   
 $s2 < 0.01 \{0.001\}$   
 $s3 < 0.01 \{0.001\}$   
 $s4 < 0.01 \{0.001\}$   
 $S02 \approx 0.85 \{0.2\}$   
 $E0 < -1 \{0.5\}$   
 $s1 \approx s2 \{0.015\}$   
 $s2 \approx s3 \{0.015\}$   
 $s3 \approx s4 \{0.015\}$   
 $|(v1 - v0)| \approx 2.67 \{0.05\}$   
 $|(v2 - v0)| \approx 3.78 \{0.05\}$   
 $|(v2 - v1)| \approx 2.67 \{0.05\}$   
 $|(v3 - v0)| \approx 4.27 \{0.05\}$   
 $|(v3 - v1)| \approx 2.67 \{0.05\}$   
 $|(v4 - v0)| \approx 4.67 \{0.05\}$   
 $|(v4 - v2)| \approx 2.67 \{0.05\}$   
 $|(v5 - v0)| \approx 5.06 \{0.05\}$   
 $|(v5 - v3)| \approx 2.67 \{0.05\}$   
 $|(v5 - v2)| \approx 2.67 \{0.05\}$   
 $|(v5 - v1)| \approx 2.67 \{0.05\}$   
 $s5 > 0.001 \{0.001\}$   
 $s5 < 0.01 \{0.001\}$   
 $s4 \approx s5 \{0.015\}$   
 $|(v6 - v0)| \approx 5.33 \{0.05\}$   
 $|(v6 - v4)| \approx 2.67 \{0.05\}$   
 $s6 > 0.001 \{0.001\}$   
 $s6 < 0.01 \{0.001\}$   
 $s7 > 0.001 \{0.001\}$   
 $s7 < 0.01 \{0.001\}$   
 $|(v7 - v0)| \approx 2.7 \{0.05\}$   
 $N5 < 12 \{2\}$

Pt<sub>1.5</sub>Ru<sub>1</sub> catalyst (fresh, poisoned, regenerated)

s1 > 0.001 {0.001}  
s2 > 0.001 {0.001}  
s3 > 0.001 {0.001}  
s4 > 0.001 {0.001}  
s1 < 0.01 {0.001}  
s2 < 0.01 {0.001}  
s3 < 0.01 {0.001}  
s4 < 0.01 {0.001}  
S02 ≈ 0.85 {0.2}  
E0 < -1 {0.5}  
s1 ≈ s2 {0.015}  
s2 ≈ s3 {0.015}  
s3 ≈ s4 {0.015}  
|(v1 - v0)| ≈ 2.67 {0.05}  
|(v2 - v0)| ≈ 3.78 {0.05}  
|(v2 - v1)| ≈ 2.67 {0.05}  
|(v3 - v0)| ≈ 4.27 {0.05}  
|(v3 - v1)| ≈ 2.67 {0.05}  
|(v4 - v0)| ≈ 4.67 {0.05}  
|(v4 - v2)| ≈ 2.67 {0.05}  
|(v5 - v0)| ≈ 5.06 {0.05}  
|(v5 - v3)| ≈ 2.67 {0.05}  
|(v5 - v2)| ≈ 2.67 {0.05}  
|(v5 - v1)| ≈ 2.67 {0.05}  
s5 > 0.001 {0.001}  
s5 < 0.01 {0.001}  
s4 ≈ s5 {0.015}  
|(v6 - v0)| ≈ 5.33 {0.05}  
|(v6 - v4)| ≈ 2.67 {0.05}  
s6 > 0.001 {0.001}  
s6 < 0.01 {0.001}  
|(v7 - v0)| ≈ 2.72 {0.01}  
s7 > 0.001 {0.001}  
s7 < 0.01 {0.001}

Pt<sub>1</sub>Ru<sub>1.5</sub> catalyst

s1 > 0.001 {0.001}  
s2 > 0.001 {0.001}  
s3 > 0.001 {0.001}  
s4 > 0.001 {0.001}  
s1 < 0.01 {0.001}  
s2 < 0.01 {0.001}  
s3 < 0.01 {0.001}

$s_4 < 0.01 \{0.001\}$   
 $S_{02} \approx 0.85 \{0.2\}$   
 $E_0 < -1 \{0.5\}$   
 $s_1 \approx s_2 \{0.015\}$   
 $s_2 \approx s_3 \{0.015\}$   
 $s_3 \approx s_4 \{0.015\}$   
 $|(v_1 - v_0)| \approx 2.67 \{0.05\}$   
 $|(v_2 - v_0)| \approx 3.78 \{0.05\}$   
 $|(v_2 - v_1)| \approx 2.67 \{0.05\}$   
 $|(v_3 - v_0)| \approx 4.27 \{0.05\}$   
 $|(v_3 - v_1)| \approx 2.67 \{0.05\}$   
 $|(v_4 - v_0)| \approx 4.67 \{0.05\}$   
 $|(v_4 - v_2)| \approx 2.67 \{0.05\}$   
 $|(v_5 - v_0)| \approx 5.06 \{0.05\}$   
 $|(v_5 - v_3)| \approx 2.67 \{0.05\}$   
 $|(v_5 - v_2)| \approx 2.67 \{0.05\}$   
 $|(v_5 - v_1)| \approx 2.67 \{0.05\}$   
 $s_5 > 0.001 \{0.001\}$   
 $s_5 < 0.01 \{0.001\}$   
 $s_4 \approx s_5 \{0.015\}$   
 $|(v_6 - v_0)| \approx 5.33 \{0.05\}$   
 $|(v_6 - v_4)| \approx 2.67 \{0.05\}$   
 $s_6 > 0.001 \{0.001\}$   
 $s_6 < 0.01 \{0.001\}$   
 $s_7 > 0.001 \{0.001\}$   
 $s_7 < 0.01 \{0.001\}$   
 $|(v_8 - v_0)| \approx 2.7 \{0.01\}$   
 $|(v_7 - v_0)| \approx 2 \{0.01\}$   
 $s_7 \approx s_8 \{0.015\}$   
 $s_8 > 0.001 \{0.001\}$   
 $s_8 < 0.01 \{0.001\}$   
 $|(v_9 - v_0)| \approx 3.91 \{0.01\}$   
 $s_8 \approx s_9 \{0.015\}$   
 $s_9 > 0.001 \{0.001\}$   
 $s_9 < 0.01 \{0.001\}$   
 $|(v_9 - v_0)| \approx 3.79 \{0.01\}$   
 $|(v_9 - v_8)| \approx 2.7 \{0.05\}$
